# Supplementary material for: Enhanced catalytic activity of perovskite oxide nanofibers for combustion of methane in coal mine ventilation air
Source: Royal Society of Chemistry journal article supplement (doi:10.1039/c0jm01320j), 2010-01-01
Supplement: c0jm01320j.pdf [file c0jm01320j.pdf]

# Enhanced catalytic activity of perovskite oxides nanofibers for combustion of methane in coal mine ventilation air

Chao-qiu Chen<sup>ab</sup>, Wei Li<sup>ab</sup>, Chang-Yan Cao<sup>c</sup>, and Wei-Guo Song<sup>\*a</sup>

<sup>a</sup>Beijing National Laboratory for Molecular Sciences (BNLMS), Institute of Chemistry, Chinese Academy of Sciences, Beijing 100190, P. R. China. Tel & Fax: (+86)10-62557908

E-mail: wsong@iccas.ac.cn

<sup>b</sup>Graduate School of Chinese Academy of Sciences, Beijing 100049, P. R. China

<sup>c</sup>School of Materials Science and Engineering, Harbin Institute of Technology, Harbin, 150001, P.R. China

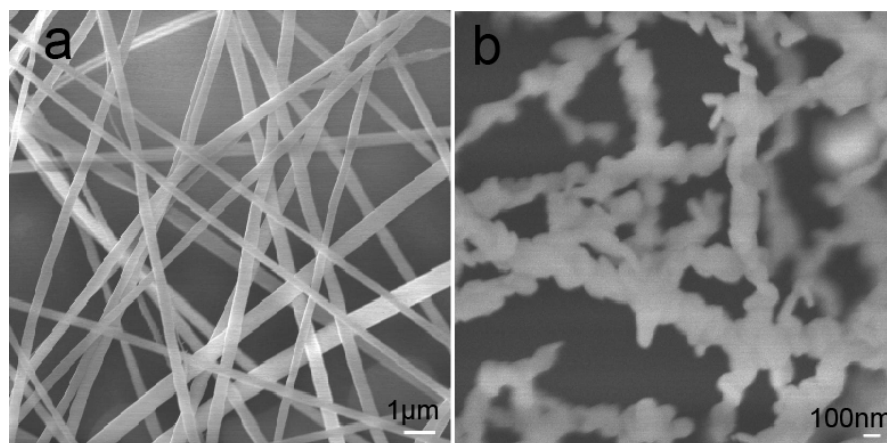

**Figure S1.** SEM images for LaCoO<sub>3</sub> precursor fibers (a) and LaCoO<sub>3</sub> calcined at 800 °C (b) prepared without citric acid

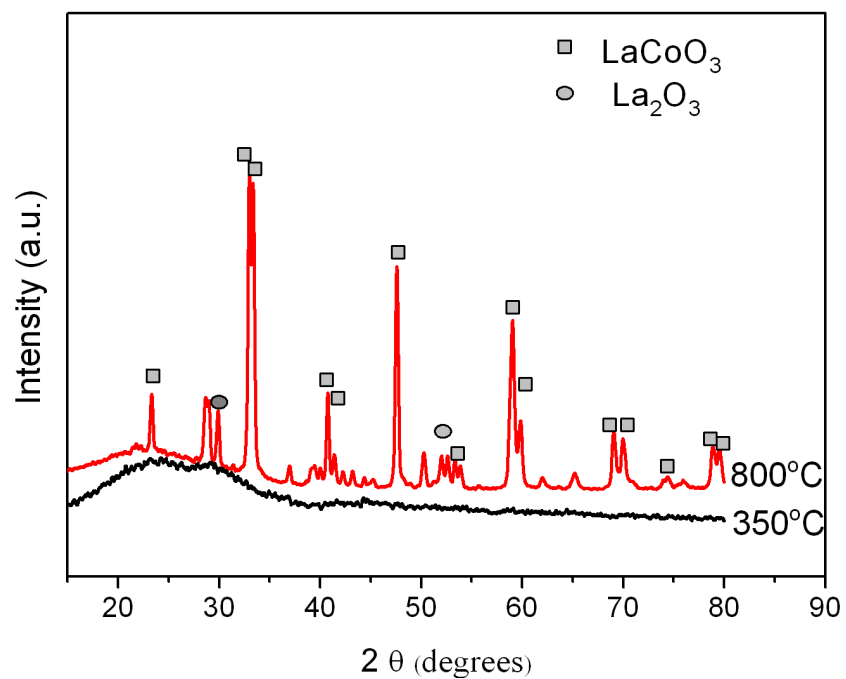

**Figure S2.** X-ray diffraction patterns of  $\text{LaCoO}_3$  prepared without citric acid and calcined at different temperature

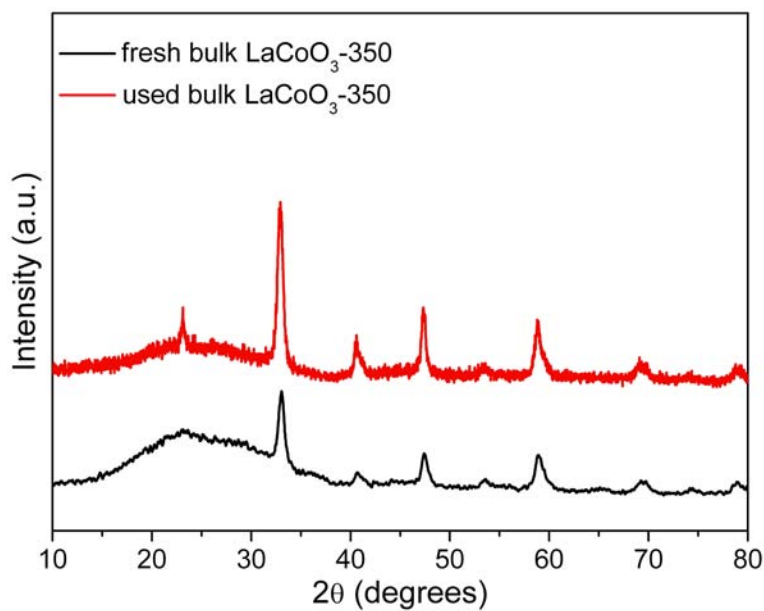

**Figure S3.** X-ray diffraction patterns of fresh and used bulk  $\text{LaCoO}_3$ -350

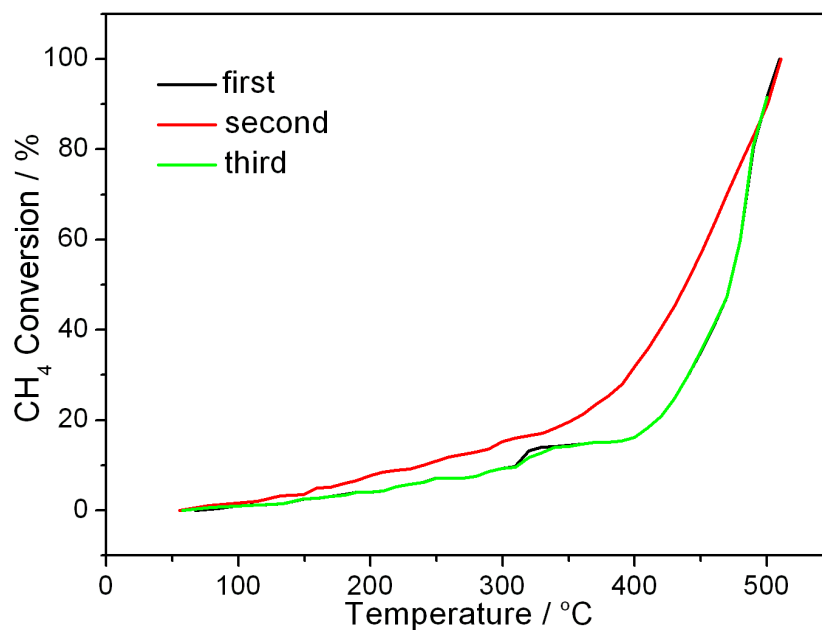

**Figure S4.** Methane conversion as a function of temperature over LaCoO<sub>3</sub> nanofibers prepared at 350 °C for first, second and third run (the third run was carried out after the stability test at 550 °C for 24h)

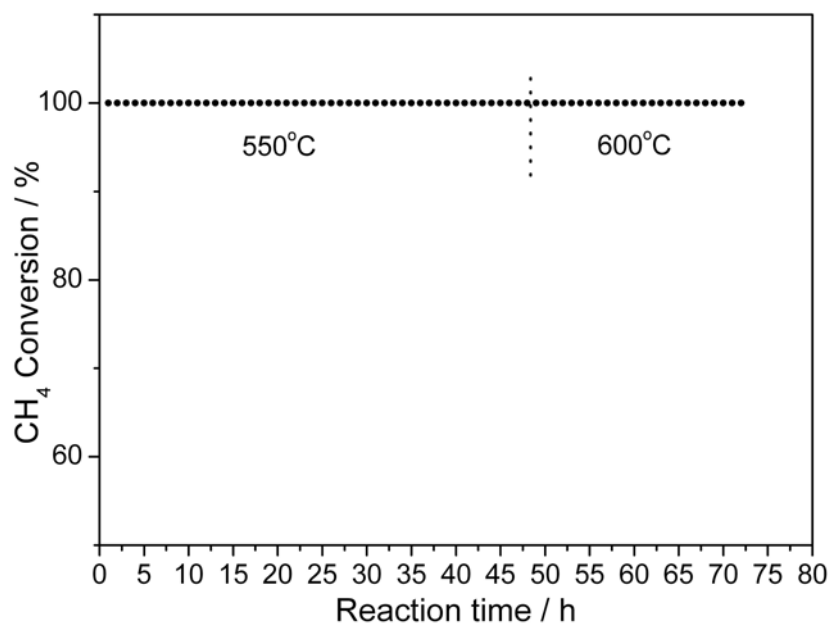

**Figure S5.** Time dependence of methane conversion over reused LaCoO<sub>3</sub> nanofibers at 550 °C for 48h and at 600 °C for 24h
